# Supplementary material
Source: Springer Nature journal article supplement (https://www.springermedizin.de/resource/supplementary/12875_2012_775_MOESM1_ESM.pdf/9435128)

Identifying the evidence and developing theory

Modelling

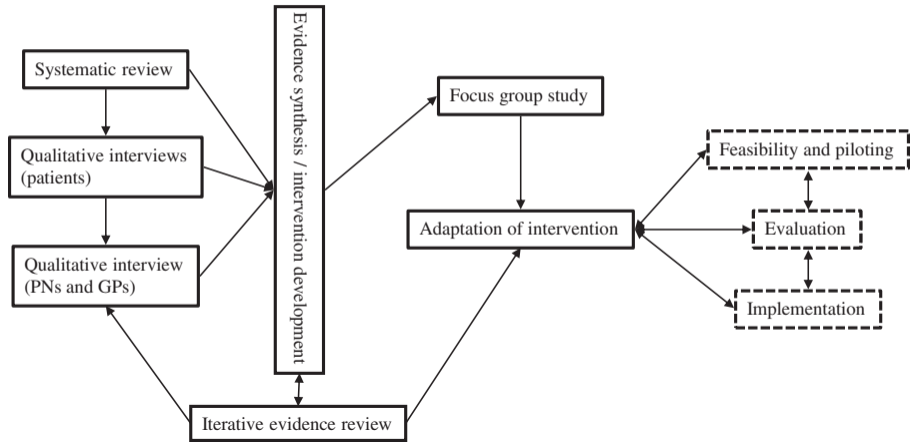

Supplement: MOESM1 [file 9435128]
